# Supplementary material for: Ciprofloxacin-Loaded Mixed Polymeric Micelles as Antibiofilm Agents
Source: MDPI journal article supplement (doi:10.3390/pharmaceutics15041147), 2023-04-04
Supplement: s1 [file s1]

# Supplementary Materials: Ciprofloxacin-Loaded Mixed Polymeric Micelles as Antibiofilm Agents

Rumena Stancheva, Tsvetelina Paunova-Krasteva, Tanya Topouzova-Hristova, Stoyanka Stoitsova and Petar Petrov Emi Haladjova,

## Supplementary information:

### 1. Preparation of mixed micelles

*Calculation of hydrophilic-lipophilic balance (HLB) of copolymers*

For HLB calculation the Griffin method [1] was used following the equation:

$$HLB = 20 * M_h/M$$

where  $M_h$  is the molar mass of the hydrophilic block of copolymer, and  $M$  is the molecular mass of the whole macromolecule.

*Determination of critical micellization concentration (CMC)*

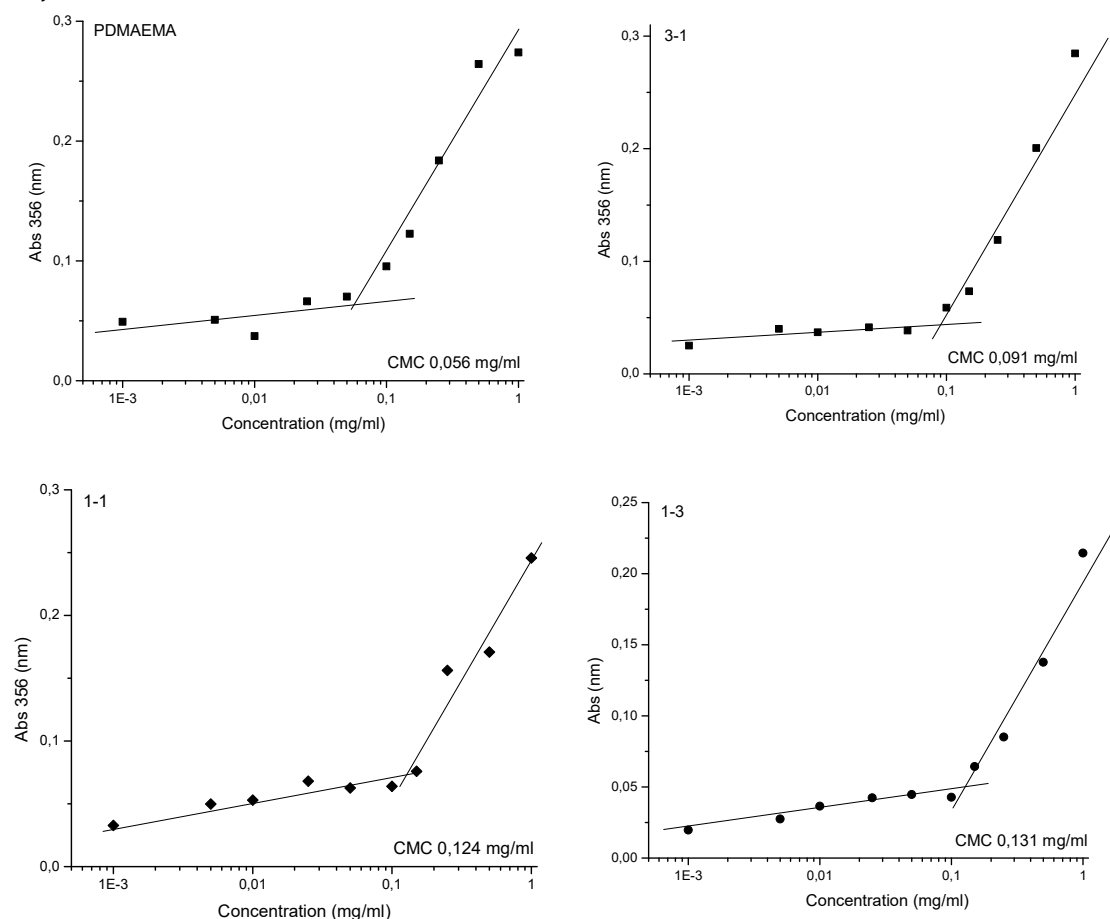

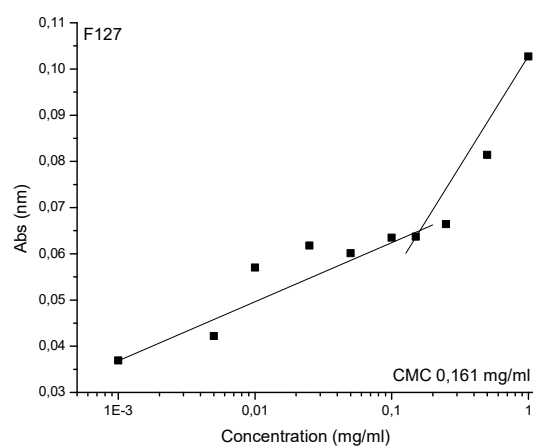

**Figure S1.** Critical micelle concentration plot of SCPMs and MPMs based on PDMAEMA-b-PCL-b-PDMAEMA and Pluronic F127 triblock copolymers.

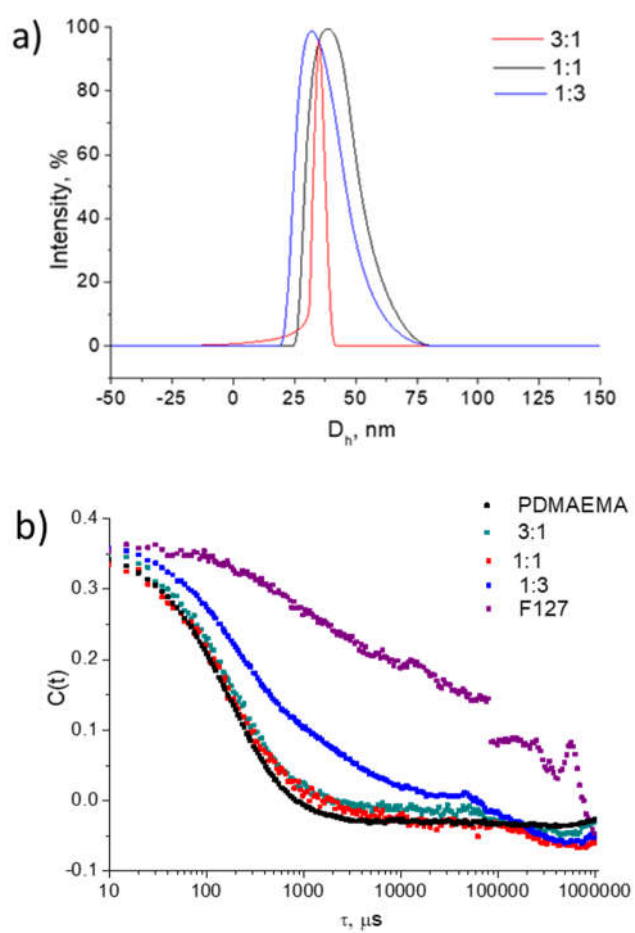

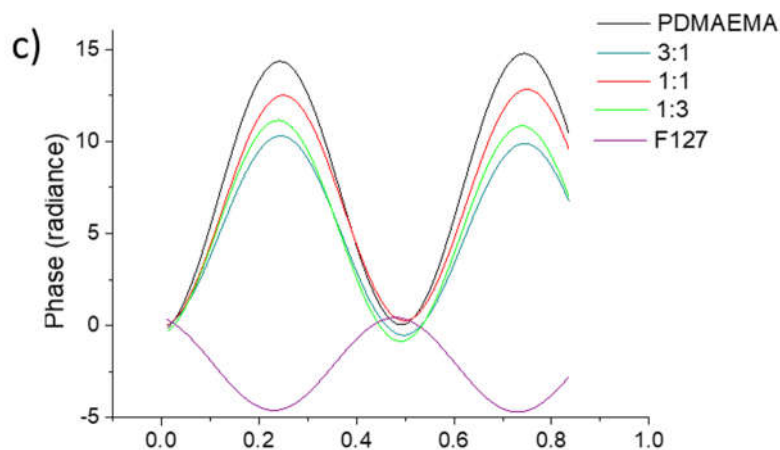

**Figure S2.** Size distribution curves (a), correlation curves (b) and phase plots (c) of SCPMs and MPMs based on PDMAEMA-*b*-PCL-*b*-PDMAEMA and Pluronic F127 triblock copolymers at concentration 0.01 mg.ml<sup>-1</sup>.

## 2. Loading of micelles with CF

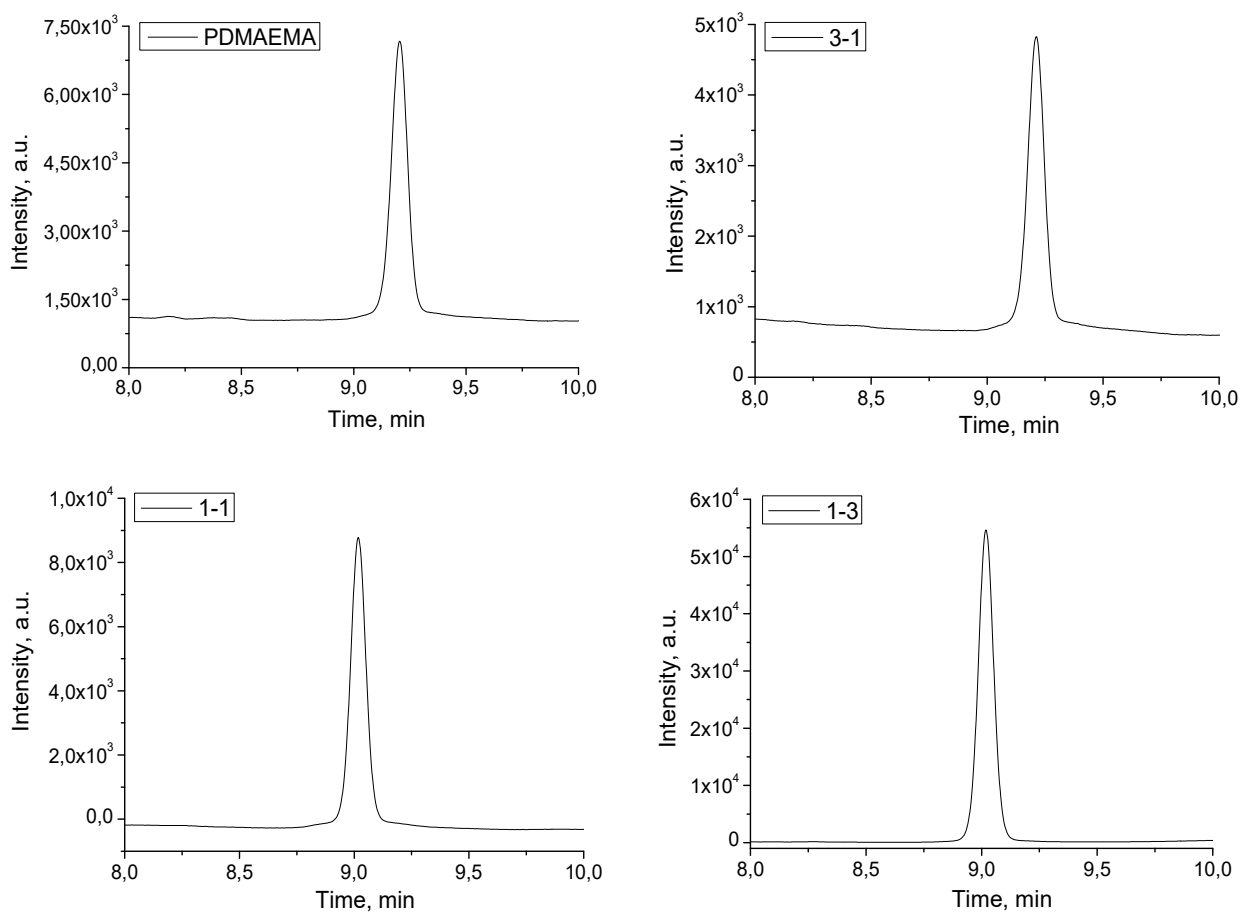

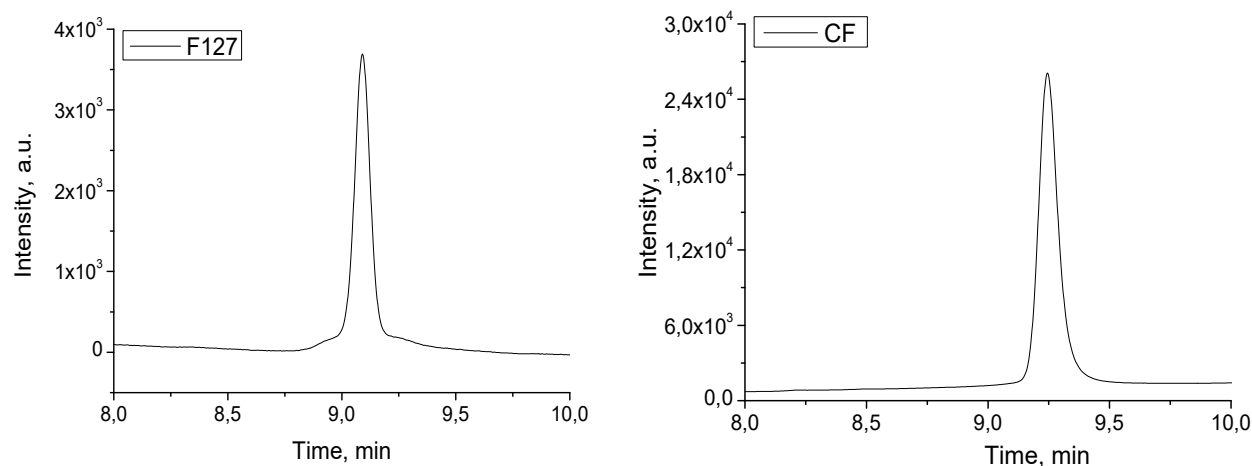

**Figure S3.** HPLC chromatograms of non-loaded (free) CF extracted from SCPMs and MPMs based on PDMAEMA-b-PCL-b-PDMAEMA and Pluronic F127 triblock copolymers. HPLC chromatogram of pure CF used as standard is given as well. The samples were prepared at polymer to drug mass ratio 10:1. The integrated area of the peaks was used for calculation of EE and DLC.

**Table S1.** Encapsulation efficiency (%) towards CF, determined by HPLC and UV spectrophotometry, of SCPMs and MPMs based on PDMAEMA-b-PCL-b-PDMAEMA and Pluronic F127 triblock copolymers prepared at different polymer to drug mass ratio. Each value represents the arithmetic mean of three separate experiments.

| Polymeric micelles<br>Polymer to drug ratio | PDMAEMA      |               | 3:1          |              | 1:1          |              | 1:3          |              | F127         |              |
|---------------------------------------------|--------------|---------------|--------------|--------------|--------------|--------------|--------------|--------------|--------------|--------------|
|                                             | HPLC         | UV            | HPLC         | UV           | HPLC         | UV           | HPLC         | UV           | HPLC         | UV           |
| 50:1                                        | 85.6<br>±4.3 | 90.9<br>±4.6  | 98.9<br>±2.9 | 97.7<br>±3.3 | 87.3<br>±5.2 | 90.2<br>±4.5 | 97.9<br>±2.4 | 97.0<br>±2.8 | 99.0<br>±1.8 | 96.4<br>±3.8 |
| 10:1                                        | 98.1<br>±4.1 | 98.7<br>±3.6  | 98.8<br>±2.5 | 99.0<br>±2.1 | 99.2<br>±1.6 | 99.2<br>±2.2 | 99.4<br>±2.1 | 99.1<br>±1.9 | 98.6<br>±1.8 | 91.2<br>±2.2 |
| 5:1                                         | 74.8<br>±4.8 | 80.1<br>±3.6  | 86.9<br>±4.3 | 92.5<br>±4.1 | 84.9<br>±3.8 | 90.7<br>±4.1 | 92.1<br>±4.5 | 94.2<br>±4.9 | 82.2<br>±4.3 | 73.0<br>±4.2 |
| 2.5:1                                       | 48.9<br>±5.0 | 59.13<br>±5.1 | 51.2<br>±5.2 | 64.1<br>±5.9 | 52.9<br>±5.2 | 69.6<br>±6.1 | 62.0<br>±6.0 | 70.3<br>±5.8 | 31.0<br>±4.6 | 30.2<br>±4.8 |
| 1:1                                         | 42.8<br>±4.3 | 68.0<br>±5.9  | 54.4<br>±5.2 | 74.6<br>±6.9 | 63.0<br>±6.0 | 70.6<br>±6.2 | 57.7<br>±6.1 | 78.6<br>±6.9 | 43.4<br>±4.3 | 41.0<br>±4.0 |

**Table S2.** Drug loading content (%) towards CF, determined by HPLC and UV spectrophotometry, of SCPMs and MPMs based on PDMAEMA-b-PCL-b-PDMAEMA and Pluronic F127 triblock copolymers prepared at different polymer to drug mass ratio. Each value represents the arithmetic mean of three separate experiments.

| Polymeric micelles<br>Polymer to drug ratio | PDMAEMA      |              | 3:1          |              | 1:1          |              | 1:3          |              | F127         |              |
|---------------------------------------------|--------------|--------------|--------------|--------------|--------------|--------------|--------------|--------------|--------------|--------------|
|                                             | HPLC         | UV           |
| 50:1                                        | 2.1<br>±0.2  | 2.2<br>±0.1  | 2.0<br>±0.2  | 2.0<br>±0.3  | 1.8<br>±0.1  | 1.9<br>±0.1  | 2.2<br>±0.1  | 2.1<br>±0.2  | 2.0<br>±0.1  | 1.9<br>±0.2  |
| 10:1                                        | 10.4<br>±0.8 | 10.5<br>±0.4 | 11.0<br>±0.5 | 10.9<br>±0.5 | 10.9<br>±0.4 | 10.9<br>±0.3 | 10.3<br>±0.4 | 10.3<br>±0.9 | 9.9<br>±0.8  | 9.3<br>±0.7  |
| 5:1                                         | 15.6<br>±1.1 | 17.0<br>±0.9 | 17.9<br>±0.6 | 18.7<br>±0.9 | 17.5<br>±0.8 | 18.7<br>±0.6 | 19.2<br>±0.8 | 19.6<br>±0.9 | 16.4<br>±0.9 | 14.6<br>±0.7 |
| 2.5:1                                       | 20.6<br>±1.9 | 25.0<br>±1.0 | 21.2<br>±1.0 | 26.6<br>±0.9 | 21.9<br>±0.9 | 28.8<br>±1.1 | 26.3<br>±0.7 | 29.8<br>±1.2 | 12.4<br>±1.3 | 12.4<br>±1.2 |
| 1:1                                         | 44.5<br>±1.3 | 70.1<br>±1.2 | 56.6<br>±1.3 | 74.4<br>±1.5 | 65.5<br>±1.2 | 73.8<br>±1.2 | 59.4<br>±1.4 | 80.3<br>±1.5 | 43.4<br>±1.8 | 41.0<br>±1.6 |

### 3. CF release from micelles

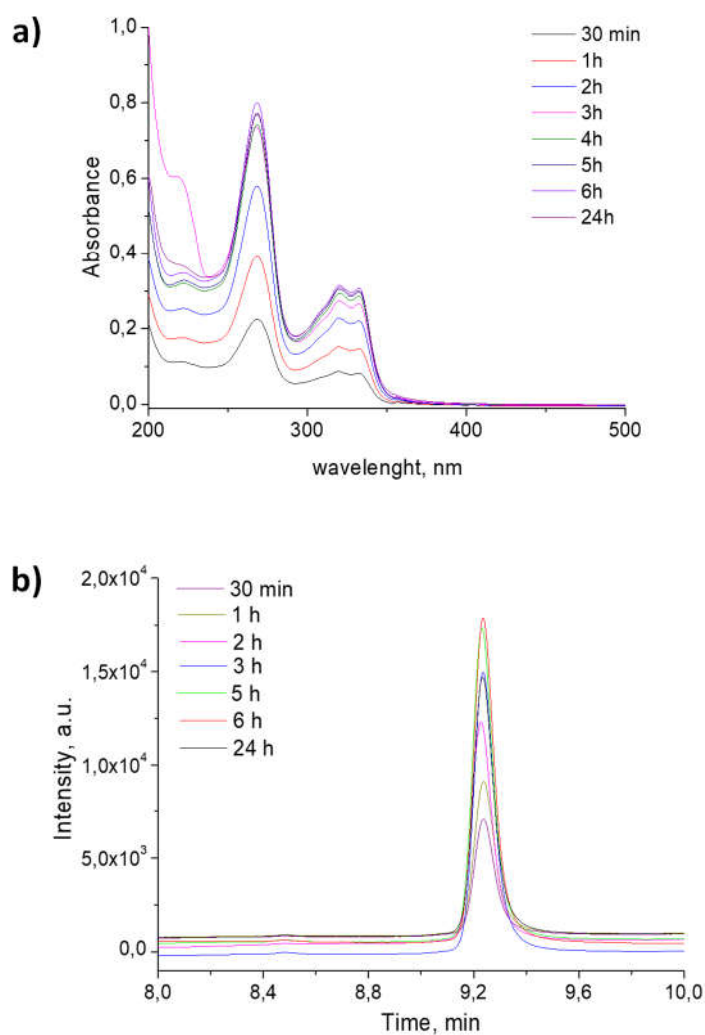

**Figure S4.** UV-Vis absorption spectra (a) and HPLC chromatograms (b) of CF released from SCPMs and MPMs based on PDMAEMA-b-PCL-b-PDMAEMA and Pluronic F127 triblock copolymers at 37 °C in phosphate buffer pH 7.4.

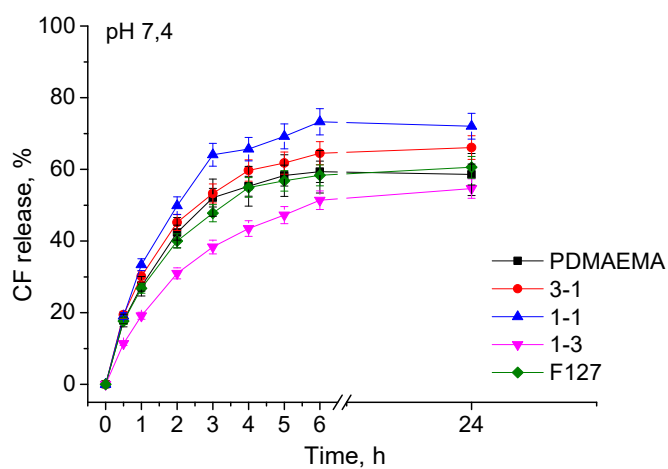

**Figure S5.** CF release profiles from SCPMs and MPMs based on PDMAEMA-b-PCL-b-PDMAEMA and Pluronic F127 triblock copolymers prepared at 10:1 polymer to drug mass ratio determined from UV-Vis spectrophotometry. The release was performed at 37 °C in phosphate buffer pH 7.4. Each data point in represents the arithmetic mean  $\pm$  SD of three separate experiments.

#### References:

1. Griffin WC: "Calculation of HLB Values of Non-Ionic Surfactants," Journal of the Society of Cosmetic Chemists 5 (1954): 259.
